# Supplementary material
Source: ML conference proceedings conference paper supplement (https://openaccess.thecvf.com/content/CVPR_2019/html/Park_Arbitrary_Style_Transfer_CVPR_2019_paper.html)
Supplement: Supplementary file 1 [file Park_Arbitrary_Style_Transfer_CVPR_2019_supplemental.pdf]

## Supplementary Materials

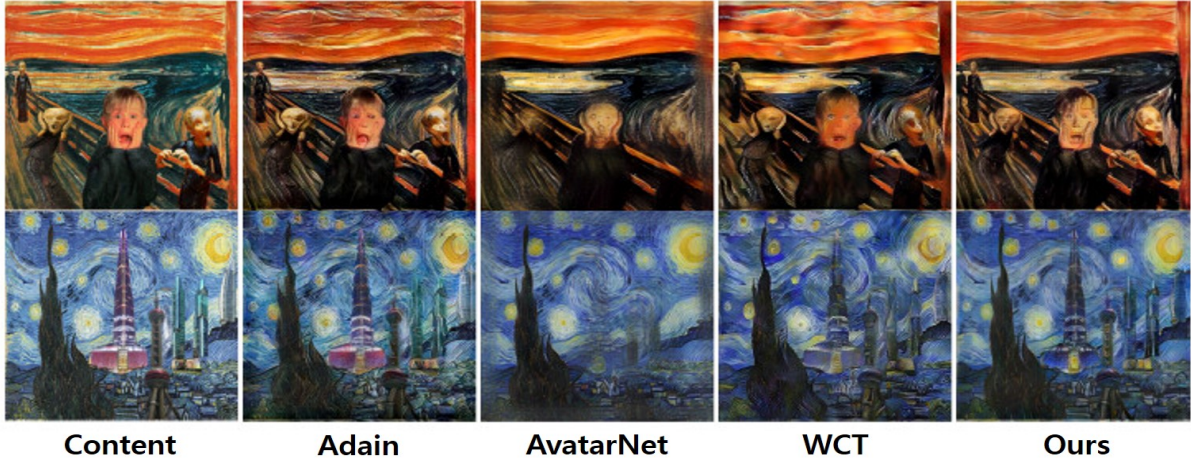

Figure 1: Comparisons of image harmonization.

### 1. Painterly Image Harmonization

The proposed method can perform painterly image harmonization. Figure 1 shows our painterly image harmonization results. The images were collected using the Google search engine.

### 2. Failure Case

Figure 2 shows a failure case of our proposed method. When the style weight is too high, some style images distort the content image too much. For such cases, a lower style weight is recommended to retain the content image.

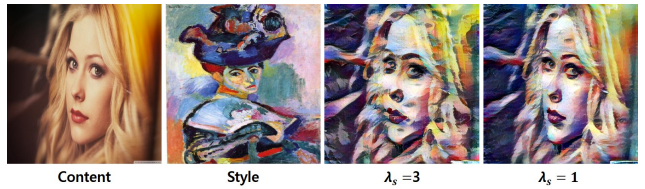

Figure 2: Failure case. At  $\lambda_s = 3$ , the high style weight distorts the content image too much. At  $\lambda_s = 1$ , the lower style weight retains the content image well.

### 3. Additional Qualitative Results

Figures 3, 4, and 5 show additional examples of our method. These examples were trained using the settings  $\lambda_c = 1$ ,  $\lambda_s = 3$ ,  $\lambda_{identity1} = 1$ , and  $\lambda_{identity2} = 50$ .



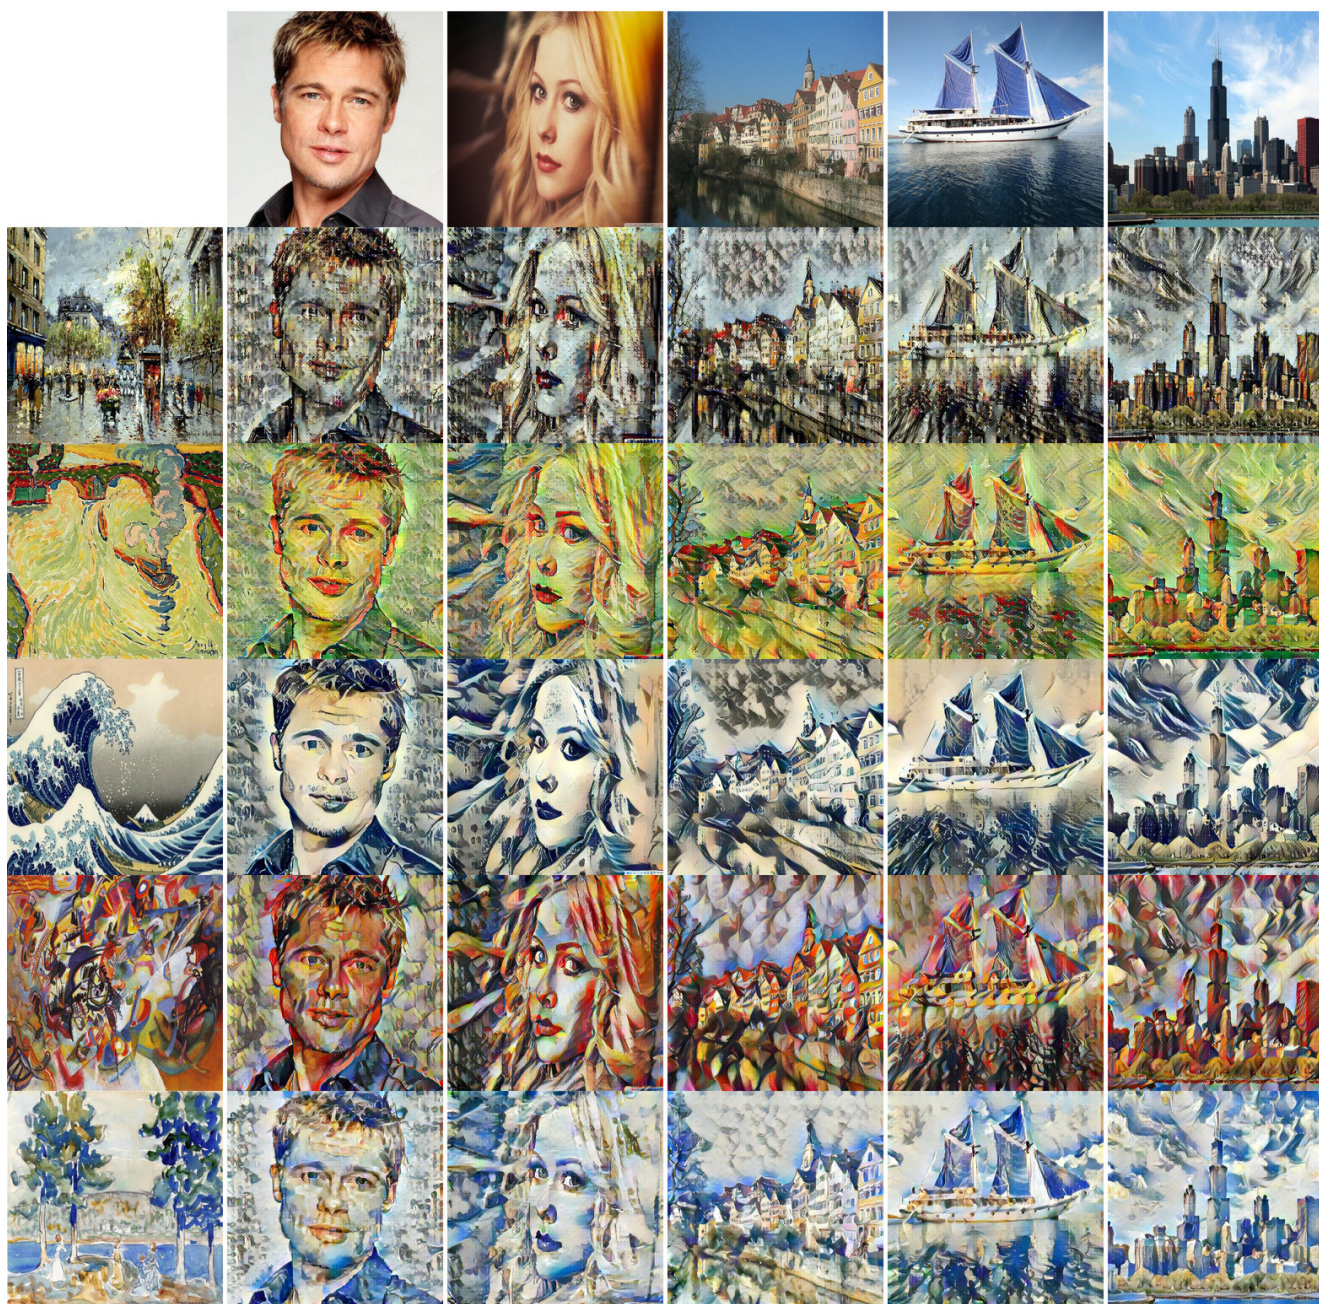

Figure 3: Example results of the proposed method (1/3). The top row shows the original content images, and the left column shows the original style images.



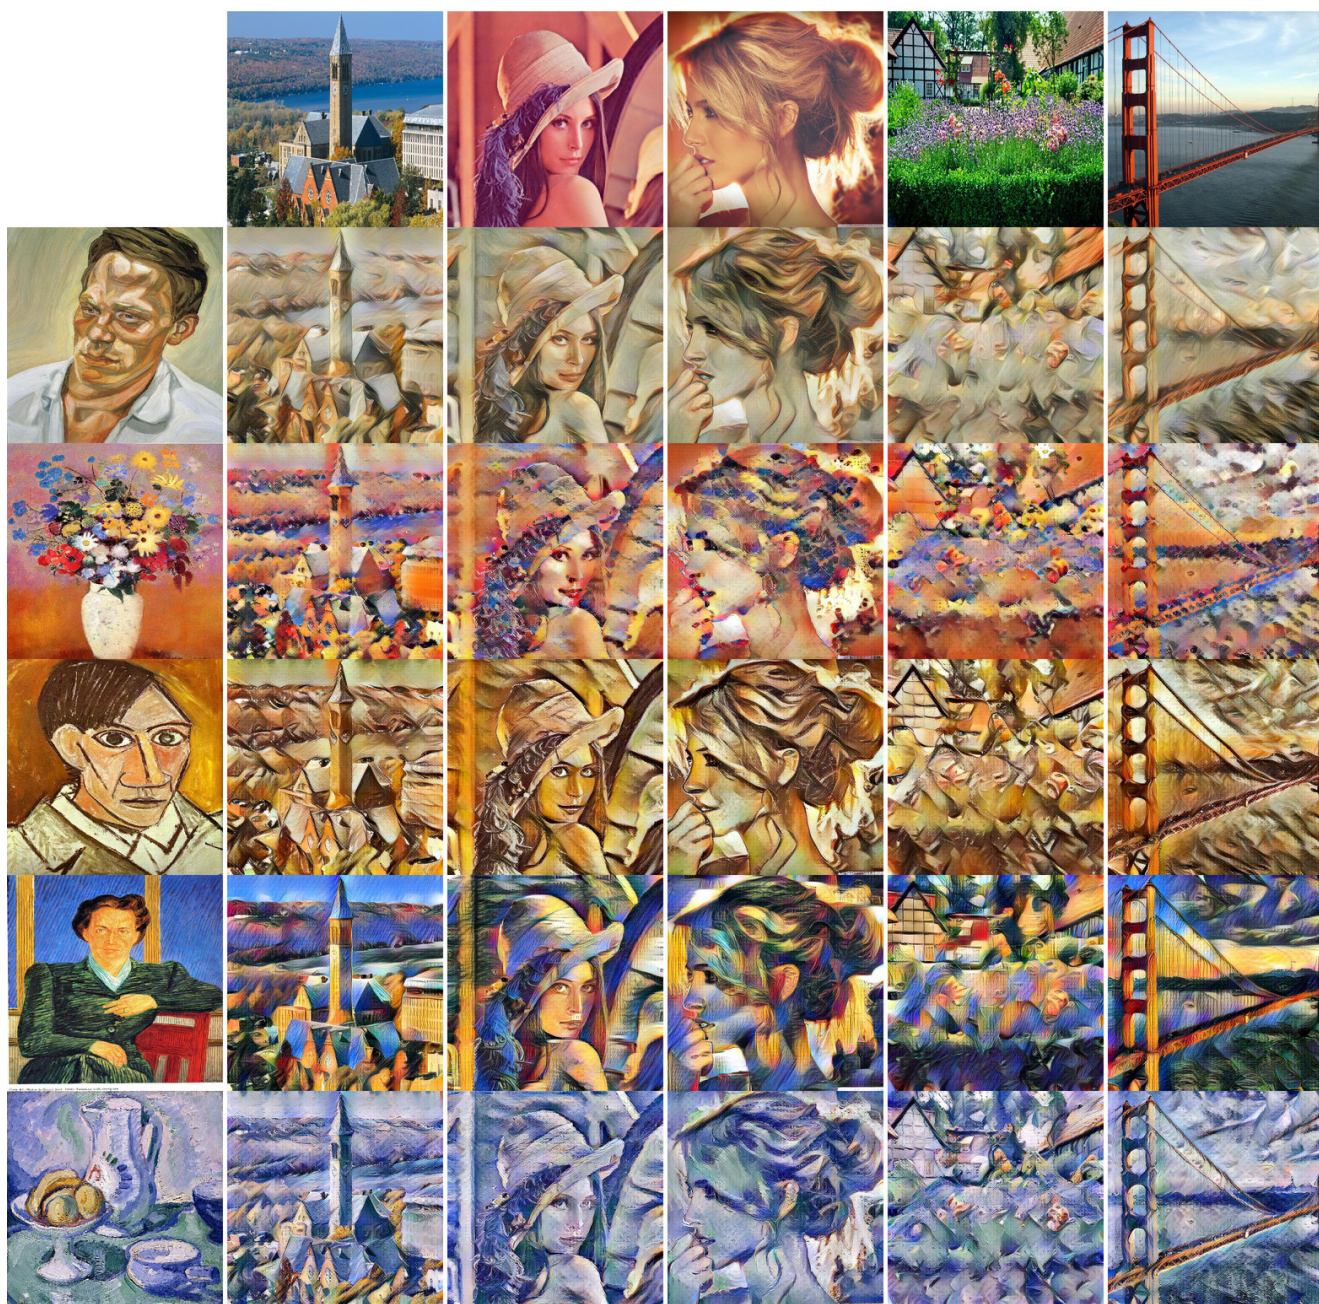

Figure 4: Example results of the proposed method (2/3). The top row shows the original content images, and the left column shows the original style images.



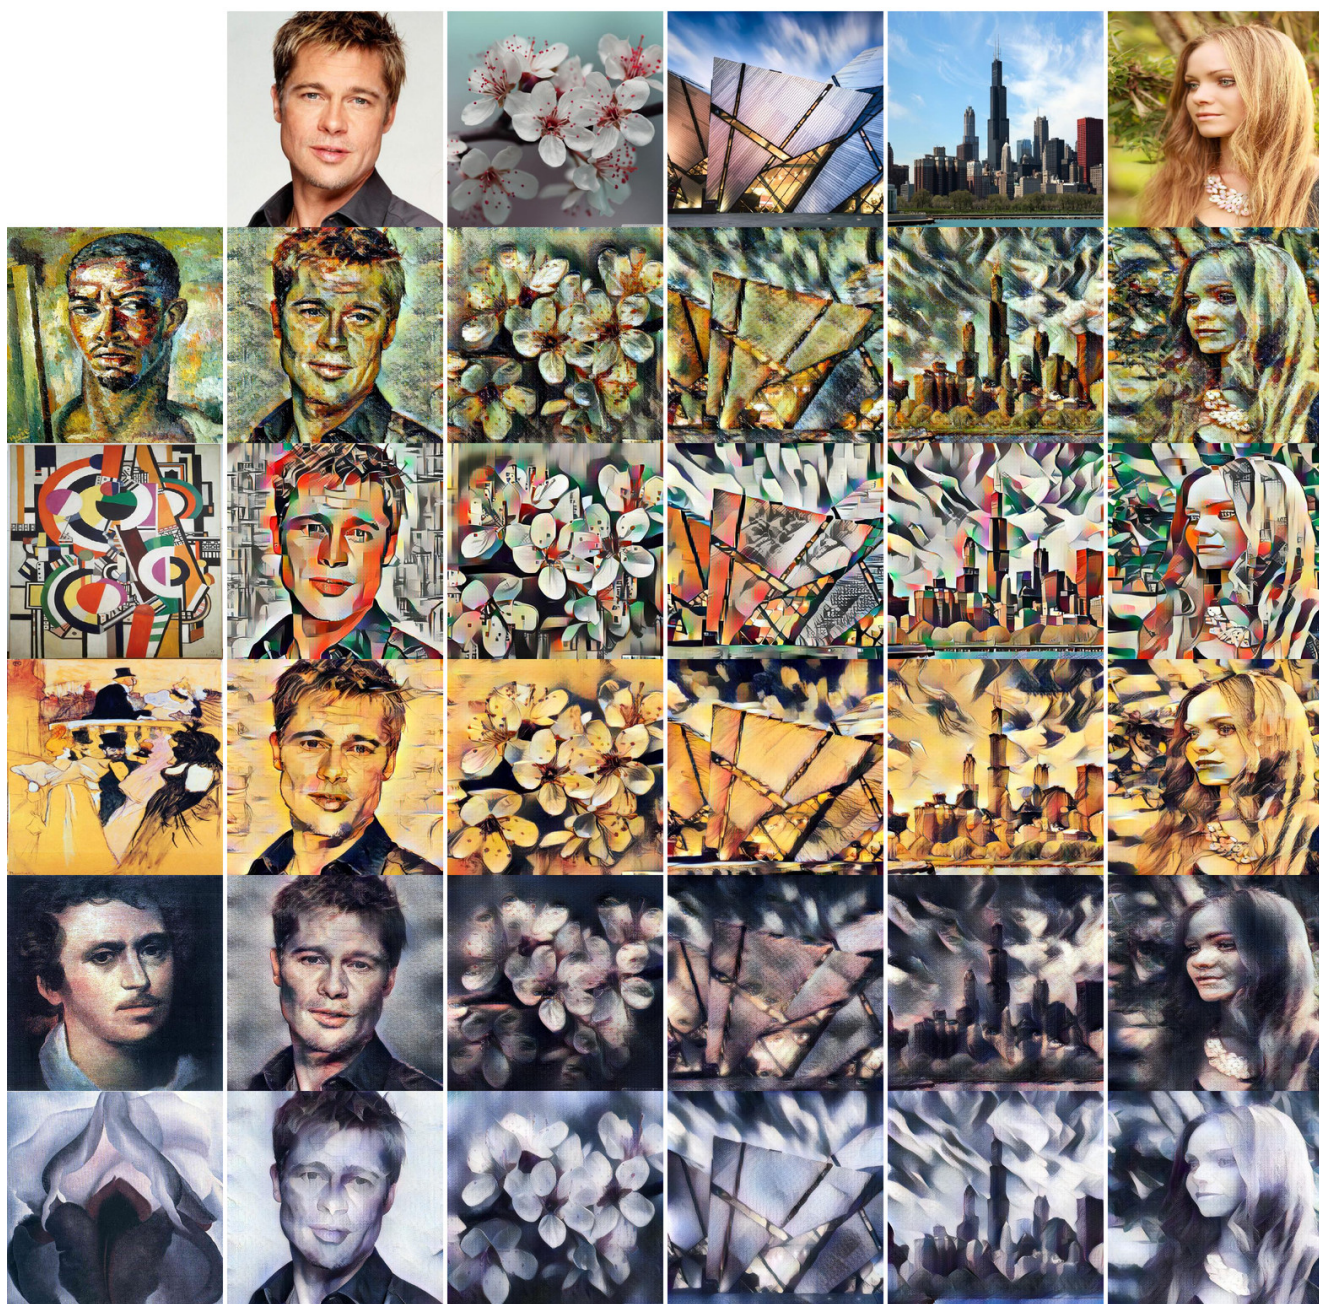

Figure 5: Example results of the proposed method (3/3). The top row shows the original content images, and the left column shows the original style images.
